# Supplementary material for: Rab GTPases as coordinators of vesicle traffic
Source: Springer Nature journal article supplement (doi:10.1038/nrm2728), 2009-07-15
Supplement: 41580_2009_BFnrm2728_MOESM1_ESM.pdf [file 41580_2009_BFnrm2728_MOESM1_ESM.pdf]

Supplementary information S1 (table) | **Human Rab GTPases and their close orthologues**

| Rab             | Family | Localization                          | Function                                                                                                           | Effectors                                                                                                                                                               | Refs        |
|-----------------|--------|---------------------------------------|--------------------------------------------------------------------------------------------------------------------|-------------------------------------------------------------------------------------------------------------------------------------------------------------------------|-------------|
| RAB1<br>A,B     | RAB3   | ER exit sites, IC                     | COP-I-mediated ER-Golgi transport. COP-II-mediated Golgi-ER transport, IC-PM transport                             | Golgin-84, Golgin-95, p115, GM130, Giantin                                                                                                                              | 1-7         |
| RAB2<br>A,B     | RAB11  | IC                                    | ER-Golgi transport, maturation of pre-Golgi intermediates, Golgi-ER transport                                      | Golgin-45, ICA69, PKC $\lambda$ /t                                                                                                                                      | 8-16        |
| RAB3<br>A,B,C,D | RAB3   | Synaptic vesicles, secretory granules | Regulated exocytosis                                                                                               | Rabphilin, Rabin3, RIM1/2, Granuphilin, Noc2, synapsin                                                                                                                  | 17-29       |
| RAB4<br>A,B,C   | RAB11  | EEs, REs                              | Endocytic recycling, G4V trafficking                                                                               | Rabip4, RCP, Rabenosyn-5, Rabaptin-5                                                                                                                                    | 30-36       |
| RAB5<br>A,B,C   | RAB5   | EEs, CCVs, Caveosomes, PM             | Endocytosis, early endosome fusion, phagosome maturation, growth factor signalling                                 | Rabaptin-5, Rabenosyn-5, EEA1, p150/Vps15, Rabankyrin-5, APPL1/2, type II inositol 5-phosphatase, type Ia PtdIns(3,4)P <sub>2</sub> 4-phosphatase, p110 $\beta$ , HAP40 | 8,37-49     |
| RAB6<br>A,B,C   | RAB6   | Golgi                                 | Intra-Golgi traffic, ER-Golgi traffic, Endosome-Golgi transport, Golgi-PM traffic, cytokinesis                     | Giantin, Rabankyrin-6, Rab6IP1, GCC185, Bicaudal D1, TMF/ARA160, Mint3, Vps52                                                                                           | 50-66       |
| RAB7<br>A*,B    | RAB7   | LEs                                   | EE-LE trafficking, lysosome biogenesis, phagosome maturation                                                       | RILP, Vps26/29/35 trimer (retromer subcomplex), Vps34, p150/Vps15                                                                                                       | 8,67-71     |
| RAB8<br>A,B     | RAB1   | TGN, G4Vs                             | TGN-PM trafficking, G4V translocation, ciliogenesis, basolateral and dendritic sorting, adherens junction assembly | Optineurin, FIP-2, Myosin Vb (only Rab8a), JRAB                                                                                                                         | 72-78       |
| RAB9<br>A,B,C   | RAB7   | LEs                                   | LE-TGN trafficking                                                                                                 | TIP47, p40, GCC185                                                                                                                                                      | 61,79-83    |
| RAB10           | RAB3   | TGN, G4Vs, ER                         | TGN-PM trafficking, G4V translocation, basolateral sorting                                                         | Rim1                                                                                                                                                                    | 7,84-86     |
| RAB11<br>A,B    | RAB11  | REs                                   | Endocytic recycling, cytokinesis                                                                                   | Nuf, FIP-2, FIP-3, FIP-4, FIP-5, Sec15 (exocyst cubunit), RCP, Myosin Vb, Protrudin (NB: binds GDP-bound form)                                                          | 36,73,87-97 |
| RAB12           | RAB3   | TGN, SGs                              | Transport from cell periphery to pericentriolar region                                                             | TGN-PM trafficking                                                                                                                                                      | 98,99       |
| RAB13           | RAB3   | Tight junctions, EEs                  | Biogenesis of tight junctions                                                                                      | JRAB                                                                                                                                                                    | 78,100      |
| RAB14           | RAB11  | EEs, TGN                              | Phagosome maturation, TGN-EE trafficking                                                                           |                                                                                                                                                                         | 101,102     |
| RAB15           | RAB3   | EEs, REs                              | Trafficking through EEs, endocytic recycling                                                                       | REP15                                                                                                                                                                   | 103-105     |
| RAB17           | RAB5   | Apical REs                            | Trafficking through apical REs, ciliogenesis                                                                       |                                                                                                                                                                         | 106-108     |
| RAB18           | RAB18  | ER, Lipid droplets, SGs               | Formation of lipid droplets from ER, ER-Golgi trafficking, negative regulator of neuroendocrine secretion          |                                                                                                                                                                         | 109-112     |
| RAB19<br>A,B    | RAB19  | Golgi                                 |                                                                                                                    |                                                                                                                                                                         | 113,114     |
| RAB20           | RAB5   | Dense apical tubules                  | Connexin-43 trafficking                                                                                            |                                                                                                                                                                         | 109,115     |
| RAB21           | RAB5   | EEs                                   | Integrin endocytosis, cytokinesis                                                                                  |                                                                                                                                                                         | 116-118     |
| RAB22           | RAB5   | EEs, TGN                              | EE-TGN and TGN-EE transport, attenuation of phagosome maturation                                                   | EEA1                                                                                                                                                                    | 98,119-122  |

## SUPPLEMENTARY INFORMATION

| Rab              | Family | Localization                           | Function                                                                                     | Effectors                                                                             | Refs        |
|------------------|--------|----------------------------------------|----------------------------------------------------------------------------------------------|---------------------------------------------------------------------------------------|-------------|
| RAB23**          | RAB23  | PM, EEs                                | Phagosome-lysosome fusion, negative regulator of sonic hedgehog signalling, ciliogenesis     |                                                                                       | 123-128     |
| RAB24            | RAB5   | Autophagosomes, nucleus                | Induction of autophagy                                                                       | Cyclophilin A, GABARAP                                                                | 98,129,130  |
| RAB25            | RAB11  | Apical REs                             | Transport through apical REs, integrin recycling                                             | Myosin Vb, Integrin $\alpha 5\beta 1$                                                 | 97,131-133  |
| RAB26            | RAB3   | SGs                                    | Regulated exocytosis of SGs                                                                  | Rim1                                                                                  | 86,134      |
| RAB27<br>A***, B | RAB3   | SGs, Melanosomes, T-cell granules      | Regulated secretion, Myosin Va recruitment to melanosomes and T-cell granules                | Rabphilin, melanophilin, Noc2, Slp1, Slp2, Slp3, Slp4/<br>granuphilin, Slp5, Munc13-4 | 86,135-142  |
| RAB28            | RAB28  | N.D.                                   | N.D.                                                                                         |                                                                                       | 143         |
| RAB29            | RAB29  | N.D.                                   | N.D.                                                                                         |                                                                                       | 144         |
| RAB30            | RAB19  | Golgi                                  | N.D.                                                                                         | Golgin-97, GCC88, GM130 (in <i>Drosophila</i> )                                       | 113,145     |
| RAB31<br>/22B    | RAB5   | TGN, EEs                               | TGN-PM and TGN-EE trafficking, attenuation of G4V trafficking                                |                                                                                       | 121,145-148 |
| RAB32            | RAB29  | Melanosomes, mitochondria              | Anchoring of PKA, post-Golgi trafficking of melanogenic enzymes, mitochondrial dynamics      | Regulatory subunit type II of PKA                                                     | 147,149,150 |
| RAB33<br>A,B     | RAB19  | Medial Golgi                           | Golgi-ER trafficking, autophagy                                                              | Atg16L, GM130, Rabaptin-5                                                             | 151,152     |
| RAB34            | RAB34  | Plasma membrane, macropinosomes, Golgi | Macropinocytosis, lysosome positioning                                                       | RILP, Hmunc13                                                                         | 153-155     |
| RAB35            | RAB3   | REs                                    | Endocytic recycling, cytokinesis, phagosome-lysosome fusion, immunological synapse formation |                                                                                       | 127,156,157 |
| RAB36            | RAB34  | N.D.                                   | N.D.                                                                                         |                                                                                       | 158         |
| RAB37            | RAB3   | SGs                                    | Mast cell degranulation                                                                      | Rim1                                                                                  | 86,159      |
| RAB38            | RAB29  | Melanosomes                            | Melanosome biogenesis                                                                        | Varp                                                                                  | 149,160-163 |
| RAB39            | RAB11  | Golgi                                  | N.D.                                                                                         | GCC88 (in <i>Drosophila</i> )                                                         | 113,164     |
| RAB40A,B,C       | RAB3   | Golgi (in <i>Xenopus</i> )             | Ubiquitination and localization of Rab2 (in <i>Xenopus</i> )                                 | ElonginB/C, Cullin5 (in <i>Xenopus</i> )                                              | 165         |
| RAB41            | RAB6   | N.D.                                   | N.D.                                                                                         |                                                                                       | 166         |
| RAB42            | RAB11  | N.D.                                   | N.D.                                                                                         |                                                                                       | 143         |
| RAB43            | RAB19  | Golgi                                  | ER-Golgi trafficking                                                                         |                                                                                       | 110,167     |
| RAB44            | RAB3   | N.D.                                   | N.D.                                                                                         |                                                                                       | 143         |

Classification into subfamilies is according to Refs 143 and 168. Rab-like proteins with distant similarities to the Rab family have not been included in the table.

\* Mutated in Charcot-Marie-Tooth type 2B disease. \*\* Mutated in Griscelli syndrome type 2. \*\*\* Mutated in Carpenter's syndrome.

Abbreviations: EE, early endosome; ER, endoplasmic reticulum; G4V, GLUT4 vesicle; IC, pre-Golgi intermediate compartment; LE, late endosome; N.D., not determined; PM, plasma membrane; RE, recycling endosome; SG, secretory granule, SV, synaptic vesicle; TGN, *trans*-Golgi network.

1. Carlsson,S.R., Roth,J., Piller,F. & Fukuda,M. Isolation and characterization of human lysosomal membrane glycoproteins, h-lamp-1 and h-lamp-2. Major sialoglycoproteins carrying polyactosaminoglycan. *J. Biol. Chem.* **263**, 18911-18919 (1988).
2. Moyer,B.D., Allan,B.B. & Balch,W.E. Rab1 interaction with a GM130 effector complex regulates COPII vesicle cis-Golgi tethering. *Traffic* **2**, 268-276 (2001).
3. Allan,B.B., Moyer,B.D. & Balch,W.E. Rab1 recruitment of p115 into a cis-SNARE complex: programming budding COPII vesicles for fusion. *Science* **289**, 444-448 (2000).
4. Plutner,H. *et al.* Rab1 b regulates vesicular transport between the endoplasmic reticulum and successive Golgi compartments. *J Cell Biol* **115**, 31-43 (1991).
5. Segev,N., Mulholland,J. & Botstein,D. The yeast GTP-binding YPT1 protein and a mammalian counterpart are associated with the secretion machinery. *Cell* **52**, 915-924 (1988).
6. Sannerud,R. *et al.* Rab1 defines a novel pathway connecting the pre-Golgi intermediate compartment with the cell periphery. *Mol. Biol. Cell* **17**, 1514-1526 (2006).
7. Gilchrist,A. *et al.* Quantitative proteomics analysis of the secretory pathway. *Cell* **127**, 1265-1281 (2006).
8. Chavrier,P., Parton,R.G., Hauri,H.P., Simons,K. & Zerial,M. Localization of low molecular weight GTP binding proteins to exocytic and endocytic compartments. *Cell* **62**, 317-329 (1990).
9. Tisdale,E.J., Bourne,J.R., Khosravi-Far,R., Der,C.J. & Balch,W.E. GTP-binding mutants of rab1 and rab2 are potent inhibitors of vesicular transport from the endoplasmic reticulum to the Golgi complex. *J. Cell Biol.* **119**, 749-761 (1992).
10. Tisdale,E.J. & Balch,W.E. Rab2 is essential for the maturation of pre-Golgi intermediates. *J. Biol. Chem.* **271**, 29372-29379 (1996).
11. Tisdale,E.J., Plutner,H., Matteson,J. & Balch,W.E. p53/58 binds COP1 and is required for selective transport through the early secretory pathway. *J. Cell Biol.* **137**, 581-593 (1997).
12. Tisdale,E.J. & Jackson,M.R. Rab2 protein enhances coatmer recruitment to pre-Golgi intermediates. *J. Biol. Chem.* **273**, 17269-17277 (1998).
13. Tisdale,E.J. A Rab2 mutant with impaired GTPase activity stimulates vesicle formation from pre-golgi intermediates. *Mol. Biol. Cell* **10**, 1837-1849 (1999).
14. Buffa,L., Fuchs,E., Pietropaolo,M., Barr,F. & Solimena,M. ICA69 is a novel Rab2 effector regulating ER-Golgi trafficking in insulinoma cells. *Eur. J. Cell Biol.* **87**, 197-209 (2008).
15. Tisdale,E.J. Rab2 interacts directly with atypical protein kinase C (aPKC) iota/lambda and inhibits aPKC*iota/lambda*-dependent glycerolaldehyde-3-phosphate dehydrogenase phosphorylation. *J. Biol. Chem.* **278**, 52524-52530 (2003).
16. Short,B. *et al.* A GRASP55-rab2 effector complex linking Golgi structure to membrane traffic. *J. Cell Biol.* **155**, 877-883 (2001).
17. Brondyk,W.H. *et al.* Interaction cloning of Rabin3, a novel protein that associates with the Ras-like GTPase Rab3A. *Mol Cell Biol* **15**, 1137-1143 (1995).
18. Darchen,F. *et al.* The GTPase Rab3a is associated with large dense core vesicles in bovine chromaffin cells and rat PC12 cells. *J Cell Sci* **108**, 1639-1649 (1990).
19. Holz,R.W., Brondyk,W.H., Senter,R.A., Kuizon,L. & Macara,I.G. Evidence for the involvement of Rab3A in Ca<sup>2+</sup>-dependent exocytosis from adrenal chromaffin cells. *J Biol Chem* **269**, 10229-10234 (1994).
20. McKiernan,C.J., Brondyk,W.H. & Macara,I.G. The Rab3A GTPase interacts with multiple factors through the same effector domain. Mutational analysis of cross-linking of Rab3A to a putative target protein. *J Biol Chem* **268**, 24449-24452 (1993).
21. Chung,S.H., Takai,Y. & Holz,R.W. Evidence that the Rab3a-binding protein, rabphilin3a, enhances regulated secretion. Studies in adrenal chromaffin cells. *J Biol Chem* **270**, 16714-16718 (1995).
22. Wang,Y., Okamoto,M., Schmitz,F., Hofmann,K. & Südhof,T.C. Rim is a putative Rab3 effector in regulating synaptic-vesicle fusion. *Nature* **388**, 593-598 (1997).
23. Giovedi,S., Darchen,F., Valtorta,F., Greengard,P. & Benfenati,F. Synapsin is a novel Rab3 effector protein on small synaptic vesicles. II. Functional effects of the Rab3A-synapsin I interaction. *J. Biol. Chem.* **279**, 43769-43779 (2004).
24. Coppola,T. *et al.* Pancreatic beta-cell protein granuphilin binds Rab3 and Munc-18 and controls exocytosis. *Mol. Biol. Cell* **13**, 1906-1915 (2002).
25. Fischer von Mollard,G., Stahl,B., Khokhlatchev,A., Südhof,T.C. & Jahn,R. Rab3C is a synaptic vesicle protein that dissociates from synaptic vesicles after stimulation of exocytosis. *J. Biol. Chem.* **269**, 10971-10974 (1994).
26. Fischer von Mollard,G., Südhof,T.C. & Jahn,R. A small GTP-binding protein dissociates from synaptic vesicles during exocytosis. *Nature* **349**, 79-81 (1991).
27. Baldini,G., Hohl,T., Lin,H.Y. & Lodish,H.F. Cloning of a Rab3 isotype predominantly expressed in adipocytes. *Proc Natl Acad Sci U S A* **89**, 5049-5052 (1992).
28. Lledo,P.M., Vernier,P., Vincent,J.D., Mason,W.T. & Zorec,R. Inhibition of Rab3B expression attenuates Ca(2+) dependent exocytosis in rat anterior pituitary cells. *Nature* **364**, 540-544 (1993).
29. Haynes,L.P., Evans,G.J., Morgan,A. & Burgoyne,R.D. A direct inhibitory role for the Rab3-specific effector, Noc2, in Ca2+ regulated exocytosis in neuroendocrine cells. *J. Biol. Chem.* **276**, 9726-9732 (2001).
30. van der Sluijs,P. *et al.* The small GTP-binding protein rab4 controls an early sorting event on the endocytic pathway. *Cell* **70**, 729-740 (1992).
31. Cormont,M., Mari,M., Galmiche,A., Hofman,P. & Marchand-Brustel,Y. A FYVE-finger-containing protein, Rabip4, is a Rab4 effector involved in early endosomal traffic. *Proc. Natl. Acad. Sci. U. S. A.* **98**, 1637-1642 (2001).
32. Vollenweider,P. *et al.* The small guanosine triphosphate-binding protein Rab4 is involved in insulin-induced GLUT4 translocation and actin filament rearrangement in 3T3-L1 cells. *Endocrinology* **138**, 4941-4949 (1997).
33. de Renzis,S., Sonnichsen,B. & Zerial,M. Divalent Rab effectors regulate the sub-compartmental organization and sorting of early endosomes. *Nat. Cell Biol.* **4**, 124-133 (2002).
34. Vitale,G. *et al.* Distinct Rab-binding domains mediate the interaction of rabaptin-5 with GTP-bound rab4 and rab5. *EMBO J.* **17**, 1941-1951 (1998).
35. Sonnichsen,B., De,R.S., Nielsen,E., Rietdorf,J. & Zerial,M. Distinct membrane domains of endosomes in the recycling pathway visualized by multicolor imaging of Rab4, Rab5, and Rab11. *J. Cell Biol.* **149**, 901-914 (2000).
36. Lindsay,A.J. *et al.* Rab coupling protein (RCP), a novel Rab4 and Rab11 effector protein. *J. Biol. Chem.* **277**, 12190-12199 (2002).
37. Bucci,C. *et al.* The small GTPase rab5 functions as a regulatory factor in the early endocytic pathway. *Cell* **70**, 715-728 (1992).
38. Stenmark,H. *et al.* Inhibition of rab5 GTPase activity stimulates membrane fusion in exocytosis. *EMBO J.* **13**, 1287-1296 (1994).
39. Stenmark,H., Vitale,G., Ullrich,O. & Zerial,M. Rabaptin-5 is a direct effector of the small GTPase Rab5 in endocytic membrane fusion. *Cell* **83**, 423-432 (1995).
40. Nielsen,E. *et al.* Rabenosyn-5, a novel Rab5 effector, is complexed with hVPS45 and recruited to endosomes through a FYVE finger domain. *J. Cell Biol.* **151**, 601-612 (2000).
41. Simonsen,A. *et al.* EEA1 links PI(3)K function to Rab5 regulation of endosome fusion. *Nature* **394**, 494-498 (1998).
42. Christoforidis,S. *et al.* Phosphatidylinositol-3-OH kinases are Rab5 effectors. *Nature Cell Biol.* **1**, 249-252 (1999).
43. Schnatwinkel,C. *et al.* The Rab5 effector Rabankyrin-5 regulates and coordinates different endocytic mechanisms. *PLoS Biol.* **2**, E261 (2004).
44. Miaczynska,M. *et al.* APPL proteins link Rab5 to nuclear signal transduction via an endosomal compartment. *Cell* **116**, 445-456 (2004).
45. Shin,H.W. *et al.* An enzymatic cascade of Rab5 effectors regulates phosphoinositide turnover in the endocytic pathway. *J. Cell Biol.* **170**, 607-618 (2005).
46. Pelkmans,L., Burli,T., Zerial,M. & Helenius,A. Caveolin-stabilized membrane domains as multifunctional transport and sorting devices in endocytic membrane traffic. *Cell* **118**, 767-780 (2004).
47. Pal,A., Severin,F., Lommer,B., Shevchenko,A. & Zerial,M. Huntingtin-HAP40 complex is a novel Rab5 effector that regulates early endosome motility and is up-regulated in Huntington's disease. *J. Cell Biol.* **172**, 605-618 (2006).
48. Christoforidis,S., McBride,H.M., Burgoyne,R.D. & Zerial,M. The Rab5 effector EEA1 is a core component of endosome docking. *Nature* **397**, 621-626 (1999).
49. Gorvel,J.P., Chavrier,P., Zerial,M. & Gruenberg,J. rab5 controls early endosome fusion in vitro. *Cell* **64**, 915-925 (1991).
50. Antony,C. *et al.* The small GTP-binding protein rab6p is distributed from medial Golgi to the trans-Golgi network as determined by a confocal microscopic approach. *J Cell Sci* **103**, 785-796 (1992).
51. Echard,A. *et al.* Interaction of a Golgi-associated kinesin-like protein with Rab6. *Science* **279**, 580-585 (1998).
52. Fontijn,R.D. *et al.* The human kinesin-like protein RB6K is under tight cell cycle control and is essential for cytokinesis. *Mol. Cell Biol.* **21**, 2944-2955 (2001).
53. Goud,B., Yang,C., Roa,M., Martinez,O. & Slepnev,V. Study of rab6, a ras-like GTP-binding protein associated with the Golgi complex. *Ann. NY Acad. Sci.* **733**, 340-343 (1994).
54. Mallard,F. *et al.* Early/recycling endosomes-to-TGN transport involves two SNARE complexes and a Rab6 isoform. *J. Cell Biol.* **156**, 653-664 (2002).
55. Martinez,O. *et al.* The small GTP-binding protein rab6 functions in intra-Golgi transport. *J Cell Biol* **127**, 1575-1588 (1994).
56. Martinez,O. *et al.* GTP-bound forms of rab6 induce the redistribution of Golgi proteins into the endoplasmic reticulum. *Proc. Natl. Acad. Sci. U. S. A.* **94**, 1828-1833 (1997).
57. Tixier-Vidal,A. *et al.* The small GTP-binding protein, Rab6p, is associated with both Golgi and post-Golgi synaptophysin-containing membranes during synaptogenesis of hypothalamic neurons in culture. *J Cell Sci* **105**, 935-947 (1993).
58. White,J. *et al.* Rab6 coordinates a novel Golgi to ER retrograde transport pathway in live cells. *J. Cell Biol.* **147**, 743-760 (1999).
59. Barr,F.A. A novel Rab6-interacting domain defines a family of Golgi-targeted coiled-coil proteins. *Curr. Biol.* **9**, 381-384 (1999).
60. Recacha,R. *et al.* Structural basis for recruitment of Rab6-interacting protein 1 to Golgi via a RUN domain. *Structure* **17**, 21-30 (2009).
61. Burguete,A.S., Fenn,T.D., Brunger,A.T. & Pfeffer,S.R. Rab and Arl GTPase family members cooperate in the localization of the golgin GCC185. *Cell* **132**, 286-298 (2008).
62. Matanis,T. *et al.* Bicaudal-D regulates COPI-independent Golgi-ER transport by recruiting the dynein-dynactin motor complex. *Nat. Cell Biol.* **4**, 986-992 (2002).
63. Fridmann-Sirkis,Y., Siniosoglou,S. & Pelham,H.R. TMF is a golgin that binds Rab6 and influences Golgi morphology. *BMC Cell Biol.* **5**, 18 (2004).
64. Teber,I. *et al.* Rab6 interacts with the mint3 adaptor protein. *Biol. Chem.* **386**, 671-677 (2005).
65. Lieven,H. *et al.* Characterization of the human GARP (Golgi associated retrograde protein) complex. *Exp. Cell Res.* **306**, 24-34 (2005).
66. Grigoriev,I. *et al.* Rab6 regulates transport and targeting of exocytotic carriers. *Dev. Cell* **13**, 305-314 (2007).
67. Cantalupo,G., Alifano,P., Roberti,V., Bruni,C.B. & Bucci,C. Rab-interacting lysosomal protein (RILP): the Rab7 effector required for transport to lysosomes. *EMBO J.* **20**, 683-693 (2001).
68. Feng,Y., Press,B. & Wandinger-Ness,A. Rab7: An important regulator of late endocytic membrane traffic. *J. Cell Biol.* **131**, 1435-1452 (1995).
69. Stein,M.P., Feng,Y., Cooper,K.L., Welford,A.M. & Wandinger-Ness,A. Human VPS34 and p150 are Rab7 interacting partners. *Traffic*. **4**, 754-771 (2003).
70. Via,L.E. *et al.* Arrest of mycobacterial phagosome maturation is caused by a block in vesicle fusion between stages controlled by rab5 and rab7. *J. Biol. Chem.* **272**, 13326-13331 (1997).

71. Rojas,R. *et al.* Regulation of retromer recruitment to endosomes by sequential action of Rab5 and Rab7. *J. Cell Biol.* **183**, 513-526 (2008).
72. Peränen,J., Auvinen,P., Virta,H., Wepf,R. & Simons,K. Rab8 promotes polarized membrane transport through reorganization of actin and microtubules in fibroblasts. *J. Cell Biol.* **135**, 153-167 (1996).
73. Roland,J.T., Kenworthy,A.K., Peranen,J., Caplan,S. & Goldenring,J.R. Myosin Vb interacts with Rab8a on a tubular network containing EHD1 and EHD3. *Mol. Biol. Cell* **18**, 2828-2837 (2007).
74. Huber,L.A. *et al.* Rab8, a small GTPase involved in vesicular traffic between the TGN and the basolateral plasma membrane. *J. Cell Biol.* **123**, 35-45 (1993).
75. Huber,L.A. *et al.* Protein transport to the dendritic plasma membrane of cultured neurons is regulated by rab8p. *J. Cell Biol* **123**, 47-55 (1993).
76. Ang,A.L., Folsch,H., Koivisto,U.M., Pypaert,M. & Mellman,I. The Rab8 GTPase selectively regulates AP-1B-dependent basolateral transport in polarized Madin-Darby canine kidney cells. *J. Cell Biol.* **163**, 339-350 (2003).
77. Hattula,K. & Peranen,J. FIP-2, a coiled-coil protein, links Huntingtin to Rab8 and modulates cellular morphogenesis. *Curr. Biol.* **10**, 1603-1606 (2000).
78. Yamamura,R., Nishimura,N., Nakatsuji,H., Arase,S. & Sasaki,T. The interaction of JRAB/MICAL-L2 with Rab8 and Rab13 coordinates the assembly of tight junctions and adherens junctions. *Mol. Biol. Cell* **19**, 971-983 (2008).
79. Lombardi,D. *et al.* Rab9 functions in transport between late endosomes and the trans Golgi network. *EMBO J* **12**, 677-682 (1993).
80. Diaz,E. & Pfeffer,S.R. TIP47: a cargo selection device for mannose 6-phosphate receptor trafficking. *Cell* **93**, 433-443 (1998).
81. Carroll,K.S. *et al.* Role of Rab9 GTPase in facilitating receptor recruitment by TIP47. *Science* **292**, 1373-1376 (2001).
82. Diaz,E., Schimmoller,F. & Pfeffer,S.R. A novel Rab9 effector required for endosome-to-TGN transport. *J. Cell Biol.* **138**, 283-290 (1997).
83. Reddy,J.V. *et al.* A functional role for the GCC185 golgin in mannose 6-phosphate receptor recycling. *Mol. Biol. Cell* **17**, 4353-4363 (2006).
84. Chen,Y.T., Holcomb,C. & Moore,H.P. Expression and localization of two low molecular weight GTP-binding proteins, Rab8 and Rab10, by epitope tag. *Proc. Natl. Acad. Sci. U. S. A* **90**, 6508-6512 (1993).
85. Sano,H., Roach,W.G., Peck,G.R., Fukuda,M. & Lienhard,G.E. Rab10 in insulin-stimulated GLUT4 translocation. *Biochem. J.* **411**, 89-95 (2008).
86. Fukuda,M. Distinct Rab binding specificity of Rim1, Rim2, rabphilin, and Noc2. Identification of a critical determinant of Rab3A/Rab27A recognition by Rim2. *J. Biol. Chem.* **278**, 15373-15380 (2003).
87. Wilcke,M. *et al.* Rab11 regulates the compartmentalization of early endosomes required for efficient transport from early endosomes to the trans-golgi network. *J. Cell Biol.* **151**, 1207-1220 (2000).
88. Goldenring,J.R. *et al.* Rab11 is an apically located small GTP-binding protein in epithelial tissues. *Am J Physiol* **270**, G515-G525 (1996).
89. Mammoto,A., Ohtsuka,T., Hotta,I., Sasaki,T. & Takai,Y. Rab11BP/Rabphilin-11, a downstream target of Rab11 small G protein implicated in vesicle recycling. *J. Biol. Chem.* **274**, 25517-25524 (1999).
90. Ullrich,O., Reinsch,S., Urbé,S., Zerial,M. & Parton,R.G. Rab11 regulates recycling through the pericentriolar recycling endosome. *J. Cell Biol.* **135**, 913-924 (1996).
91. Urbe,S., Huber,L.A., Zerial,M., Tooze,S.A. & Parton,R.G. Rab11, a small GTPase associated with both constitutive and regulated secretory pathways in PC12 cells. *FEBS Lett* **334**, 175-182 (1993).
92. Cao,J., Albertson,R., Riggs,B., Field,C.M. & Sullivan,W. Nuf, a Rab11 effector, maintains cytoskeletal furrow integrity by promoting local actin polymerization. *J. Cell Biol.* **182**, 301-313 (2008).
93. Hickson,G.R. *et al.* Arfopphilins are dual Arf/Rab11 binding proteins that regulate recycling endosome distribution and are related to Drosophila nuclear fallout. *Mol. Biol. Cell* **14**, 2908-2920 (2003).
94. Wallace,D.M., Lindsay,A.J., Hendrick,A.G. & McCaffrey,M.W. The novel Rab11-FIP/Rip/RCP family of proteins displays extensive homo- and hetero-interacting abilities. *Biochem. Biophys. Res. Commun.* **292**, 909-915 (2002).
95. Zhang,X.M., Ellis,S., Sriratanana,A., Mitchell,C.A. & Rowe,T. Sec15 is an effector for the Rab11 GTPase in mammalian cells. *J. Biol. Chem.* **279**, 43027-43034 (2004).
96. Shirane,M. & Nakayama,K.I. Protrudin induces neurite formation by directional membrane trafficking. *Science* **314**, 818-821 (2006).
97. Lapiere,L.A. *et al.* Myosin vb is associated with plasma membrane recycling systems. *Mol. Biol. Cell* **12**, 1843-1857 (2001).
98. Olkkonen,V.M. *et al.* Molecular cloning and subcellular localization of three GTP-binding proteins of the rab subfamily. *J. Cell Sci.* **106**, 1249-1261 (1993).
99. Iida,H., Wang,L., Nishii,K., Ookuma,A. & Shibata,Y. Identification of rab12 as a secretory granule-associated small GTP-binding protein in atrial myocytes. *Circ. Res.* **78**, 343-347 (1996).
100. Zahraoui,A. *et al.* A small rab GTPase is distributed in cytoplasmic vesicles in non polarized cells but colocalizes with the tight junction marker ZO-1 in polarized epithelial cells. *J. Cell Biol.* **124**, 101-115 (1994).
101. Junnuta,J.R. *et al.* Rab14 is involved in membrane trafficking between the Golgi complex and endosomes. *Mol. Biol. Cell* **15**, 2218-2229 (2004).
102. Kyei,G.B. *et al.* Rab14 is critical for maintenance of Mycobacterium tuberculosis phagosome maturation arrest. *EMBO J.* **25**, 5250-5259 (2006).
103. Zuk,P.A. & Elferink,L.A. Rab15 mediates an early endocytic event in Chinese hamster ovary cells. *J. Biol. Chem.* **274**, 22303-22312 (1999).
104. Zuk,P.A. & Elferink,L.A. Rab15 differentially regulates early endocytic trafficking. *J. Biol. Chem.* **275**, 26754-26764 (2000).
105. Strick,D.J. & Elferink,L.A. Rab15 effector protein: a novel protein for receptor recycling from the endocytic recycling compartment. *Mol. Biol. Cell* **16**, 5699-5709 (2005).
106. Lütcke,A. *et al.* Rab17, a novel small GTPase, is specific for epithelial cells and is induced during cell polarization. *J. Cell Biol.* **121**, 553-564 (1993).
107. Hunziker,W. & Peters,P.J. Rab17 localizes to recycling endosomes and regulates receptor-mediated transcytosis in epithelial cells. *J. Biol. Chem.* **273**, 15734-15741 (1998).
108. Zacchi,P. *et al.* Rab17 regulates membrane trafficking through apical recycling endosomes in polarized epithelial cells. *J. Cell Biol.* **140**, 1039-1053 (1998).
109. Lütcke,A. *et al.* Cloning and subcellular localization of novel rab proteins reveals polarized and cell type-specific expression. *J. Cell Sci.* **107**, 3437-3448 (1994).
110. Dejgaard,S.Y. *et al.* Rab18 and Rab43 have key roles in ER-Golgi trafficking. *J. Cell Sci.* **121**, 2768-2781 (2008).
111. Ozeki,S. *et al.* Rab18 localizes to lipid droplets and induces their close apposition to the endoplasmic reticulum-derived membrane. *J. Cell Sci.* **118**, 2601-2611 (2005).
112. Vazquez-Martinez,R. *et al.* Rab18 inhibits secretory activity in neuroendocrine cells by interacting with secretory granules. *Traffic* **8**, 867-882 (2007).
113. Sinka,R., Gillingham,A.K., Kondylis,V. & Munro,S. Golgi coiled-coil proteins contain multiple binding sites for Rab family G proteins. *J. Cell Biol.* **183**, 607-615 (2008).
114. Lütcke,A. *et al.* Isolation of a murine cDNA clone encoding Rab19, a novel tissue-specific small GTPase. *Gene* **155**, 257-260 (1995).
115. Das,S.J., Kaplan,B.E., Willemsen,D. & Koval,M. Identification of rab20 as a potential regulator of connexin 43 trafficking. *Cell Commun. Adhes.* **15**, 65-74 (2008).
116. Pellinen,T. *et al.* Integrin trafficking regulated by Rab21 is necessary for cytokinesis. *Dev. Cell* **15**, 371-385 (2008).
117. Pellinen,T. *et al.* Small GTPase Rab21 regulates cell adhesion and controls endosomal trafficking of beta1-integrins. *J. Cell Biol.* **173**, 767-780 (2006).
118. Simpson,J.C. *et al.* A role for the small GTPase Rab21 in the early endocytic pathway. *J. Cell Sci.* **117**, 6297-6311 (2004).
119. Kauppi,M. *et al.* The small GTPase Rab22 interacts with EEA1 and controls endosomal membrane trafficking. *J. Cell Sci.* **115**, 899-911 (2002).
120. Magadan,J.G., Barbieri,M.A., Mesa,R., Stahl,P.D. & Mayorga,L.S. Rab22a regulates the sorting of transferrin to recycling endosomes. *Mol. Cell Biol.* **26**, 2595-2614 (2006).
121. Rodriguez-Gabin,A.G., Cammer,M., Almazan,G., Charron,M. & Larocca,J.N. Role of rRAB22b, an oligodendrocyte protein, in regulation of transport of vesicles from trans Golgi to endocytic compartments. *J. Neurosci. Res.* **66**, 1149-1160 (2001).
122. Roberts,E.A., Chua,J., Kyei,G.B. & Deretic,V. Higher order Rab programming in phagolysosome biogenesis. *J. Cell Biol.* **174**, 923-929 (2006).
123. Olkkonen,V.M. *et al.* Isolation of a mouse cDNA encoding Rab23, a small novel GTPase expressed predominantly in the brain. *Gene* **138**, 207-211 (1994).
124. Eggenschwiler,J.T., Espinoza,E. & Anderson,K.V. Rab23 is an essential negative regulator of the mouse Sonic hedgehog signalling pathway. *Nature* **412**, 194-198 (2001).
125. Jenkins,D. *et al.* RAB23 mutations in Carpenter syndrome imply an unexpected role for hedgehog signaling in cranial-suture development and obesity. *Am. J. Hum. Genet.* **80**, 1162-1170 (2007).
126. Evans,T.M., Ferguson,C., Wainwright,B.J., Parton,R.G. & Wicking,C. Rab23, a negative regulator of hedgehog signaling, localizes to the plasma membrane and the endocytic pathway. *Traffic* **4**, 869-884 (2003).
127. Smith,A.C. *et al.* A network of Rab GTPases controls phagosome maturation and is modulated by Salmonella enterica serovar Typhimurium. *J. Cell Biol.* **176**, 263-268 (2007).
128. Yoshimura,S., Egerer,J., Fuchs,E., Haas,A.K. & Barr,F.A. Functional dissection of Rab GTPases involved in primary cilium formation. *J. Cell Biol.* **178**, 363-369 (2007).
129. Munafo,D.B. & Colombo,M.I. Induction of autophagy causes dramatic changes in the subcellular distribution of GFP-Rab24. *Traffic* **3**, 472-482 (2002).
130. Wu,M. *et al.* Human RAB24, interestingly and predominantly distributed in the nuclei of COS-7 cells, is colocalized with cyclophilin A and GABARAP. *Int. J. Mol. Med.* **17**, 749-754 (2006).
131. Casanova,J.E. *et al.* Association of Rab25 and Rab11 with the apical recycling system of polarized Madin-Darby canine kidney cells. *Mol. Biol. Cell* **10**, 47-61 (1999).
132. Wang,X., Kumar,R., Navarre,J., Casanova,J.E. & Goldenring,J.R. Regulation of vesicle trafficking in madin-darby canine kidney cells by Rab11a and Rab25. *J. Biol. Chem.* **275**, 29138-29146 (2000).
133. Caswell,P.T. *et al.* Rab25 associates with alpha5beta1 integrin to promote invasive migration in 3D microenvironments. *Dev. Cell* **13**, 496-510 (2007).
134. Yoshie,S., Imai,A., Nishida,T. & Shimomura,H. Expression, characterization, and localization of Rab26, a low molecular weight GTP-binding protein, in the rat parotid gland. *Histochem. Cell Biol.* **113**, 259-263 (2000).
135. Menasche,G. *et al.* Mutations in RAB27A cause Griscelli syndrome associated with haemophagocytic syndrome. *Nature Genet.* **25**, 173-176 (2001).
136. Hume,A.N. *et al.* Rab27a regulates the peripheral distribution of melanosomes in melanocytes. *J. Cell Biol.* **152**, 795-808 (2001).
137. Stinchcombe,J.C. *et al.* Rab27a is required for regulating secretion in cytotoxic T lymphocytes. *J. Cell Biol.* **152**, 825-833 (2001).
138. Strom,M., Hume,A.N., Tarafder,A.K., Barkagianni,E. & Seabra,M.C. A family of Rab27-binding proteins. Melanophilin links Rab27a and myosin Va function in melanosome transport. *J. Biol. Chem.* **277**, 25423-25430 (2002).
139. Matesic,L.E. *et al.* Mutations in Mlph, encoding a member of the Rab effector family, cause the melanosome transport defects observed in leaden mice. *Proc. Natl. Acad. Sci. U. S. A* **98**, 10238-10243 (2001).
140. Kuroda,T.S., Fukuda,M., Ariga,H. & Mikoshiba,K. The Slp homology domain of synaptotagmin-like proteins 1-4 and Slac2 functions as a novel Rab27A binding domain. *J. Biol. Chem.* **277**, 9212-9218 (2002).

## SUPPLEMENTARY INFORMATION

141. Kuroda, T.S., Fukuda, M., Ariga, H. & Mikoshiba, K. Synaptotagmin-like protein 5: a novel Rab27A effector with C-terminal tandem C2 domains. *Biochem. Biophys. Res. Commun.* **293**, 899-906 (2002).
142. Shirakawa, R. *et al.* Purification and functional analysis of a Rab27 effector munc 13-4 using a semi-intact platelet dense-granule secretion assay. *Methods Enzymol.* **403**, 778-788 (2005).
143. Schwartz, S.L., Cao, C., Pylypenko, O., Rak, A. & Wandinger-Ness, A. Rab GTPases at a glance. *J. Cell Sci.* **120**, 3905-3910 (2007).
144. Massmann, S., Schurmann, A. & Joost, H.G. Cloning of two splicing variants of the novel Ras-related GTPase Rab29 which is predominantly expressed in kidney. *Biochim. Biophys. Acta* **1352**, 48-55 (1997).
145. Chen, D., Guo, J.R., Miki, T., Tachibana, M. & Gahl, W.A. Molecular cloning of two novel *rab* genes from human melanocytes. *Gene* **174**, 129-134 (1996).
146. Ng, E.L., Wang, Y. & Tang, B.L. Rab22B's role in trans-Golgi network membrane dynamics. *Biochem. Biophys. Res. Commun.* **361**, 751-757 (2007).
147. Bao, X., Faris, A.E., Jang, E.K. & Haslam, R.J. Molecular cloning, bacterial expression and properties of Rab31 and Rab32. *Eur. J. Biochem.* **269**, 259-271 (2002).
148. Lodhi, I.J. *et al.* Gapex-5, a Rab31 guanine nucleotide exchange factor that regulates Glut4 trafficking in adipocytes. *Cell Metab* **5**, 59-72 (2007).
149. Wasmeier, C. *et al.* Rab38 and Rab32 control post-Golgi trafficking of melanogenic enzymes. *J. Cell Biol.* **175**, 271-281 (2006).
150. Alto, N.M., Soderling, J. & Scott, J.D. Rab32 is an A-kinase anchoring protein and participates in mitochondrial dynamics. *J. Cell Biol.* **158**, 659-668 (2002).
151. Valsdottir, R. *et al.* Identification of rabaptin-5, rabex-5, and GM130 as putative effectors of rab33b, a regulator of retrograde traffic between the Golgi apparatus and ER. *FEBS Lett.* **508**, 201-209 (2001).
152. Itoh, T. *et al.* Golgi-resident small GTPase Rab33B interacts with Atg16L and modulates autophagosome formation. *Mol. Biol. Cell* **19**, 2916-2925 (2008).
153. Wang, T. & Hong, W. Interorganellar regulation of lysosome positioning by the Golgi apparatus through Rab34 interaction with Rab-interacting lysosomal protein. *Mol. Biol. Cell* **13**, 4317-4332 (2002).
154. Sun, P. *et al.* Small GTPase Rah/Rab34 is associated with membrane ruffles and macropinosomes and promotes macropinosome formation. *J. Biol. Chem.* **278**, 4063-4071 (2003).
155. Speight, P. & Silverman, M. Diacylglycerol-activated Hmunc13 serves as an effector of the GTPase Rab34. *Traffic* **6**, 858-865 (2005).
156. Kouranti, I., Sachse, M., Arouche, N., Goud, B. & Echard, A. Rab35 regulates an endocytic recycling pathway essential for the terminal steps of cytokinesis. *Curr. Biol.* **16**, 1719-1725 (2006).
157. Patino-Lopez, C. *et al.* Rab35 and its GAP EPI64C in T cells regulate receptor recycling and immunological synapse formation. *J. Biol. Chem.* **283**, 18323-18330 (2008).
158. Mori, T. *et al.* Cloning and characterization of a novel *Rab*-family gene, *Rab36*, within the region at 22q11.2 that is homozygously deleted in malignant rhabdoid tumors. *Biochem. Biophys. Res. Commun.* **254**, 594-600 (1999).
159. Masuda, E.S. *et al.* Rab37 is a novel mast cell specific GTPase localized to secretory granules. *FEBS Lett.* **470**, 61-64 (2000).
160. Jager, D. *et al.* Serological cloning of a melanocyte rab guanosine 5'-triphosphate-binding protein and a chromosome condensation protein from a melanoma complementary DNA library. *Cancer Res.* **60**, 3584-3591 (2000).
161. Loftus, S.K. *et al.* Mutation of melanosome protein RAB38 in chocolate mice. *Proc. Natl. Acad. Sci. U. S. A* **99**, 4471-4476 (2002).
162. Lopes, V.S., Wasmeier, C., Seabra, M.C. & Futter, C.E. Melanosome maturation defect in Rab38-deficient retinal pigment epithelium results in instability of immature melanosomes during transient melanogenesis. *Mol. Biol. Cell* **18**, 3914-3927 (2007).
163. Wang, F. *et al.* Varp interacts with Rab38 and functions as its potential effector. *Biochem. Biophys. Res. Commun.* **372**, 162-167 (2008).
164. Chen, T. *et al.* Rab39, a novel Golgi-associated Rab GTPase from human dendritic cells involved in cellular endocytosis. *Biochem. Biophys. Res. Commun.* **303**, 1114-1120 (2003).
165. Lee, R.H. *et al.* XRab40 and XCullin5 form a ubiquitin ligase complex essential for the noncanonical Wnt pathway. *EMBO J.* **26**, 3592-3606 (2007).
166. Guo, J.H. *et al.* Isolation, expression pattern of a novel human RAB gene RAB41 and characterization of its intronless homolog RAB41P. *DNA Seq.* **14**, 431-435 (2003).
167. Haas, A.K. *et al.* Analysis of GTPase-activating proteins: Rab1 and Rab43 are key Rabs required to maintain a functional Golgi complex in human cells. *J. Cell Sci.* **120**, 2997-3010 (2007).
168. Pereira-Leal, J.B. & Seabra, M.C. Evolution of the Rab family of small GTP-binding proteins. *J. Mol. Biol.* **313**, 889-901 (2001).
